# Supplementary figures and images for: Enhancing Triage Efficiency and Accuracy in Emergency Rooms for Patients with Metastatic Prostate Cancer: A Retrospective Analysis of Artificial Intelligence-Assisted Triage Using ChatGPT 4.0
Source: MDPI journal article supplement (doi:10.3390/cancers15143717), 2023-07-22

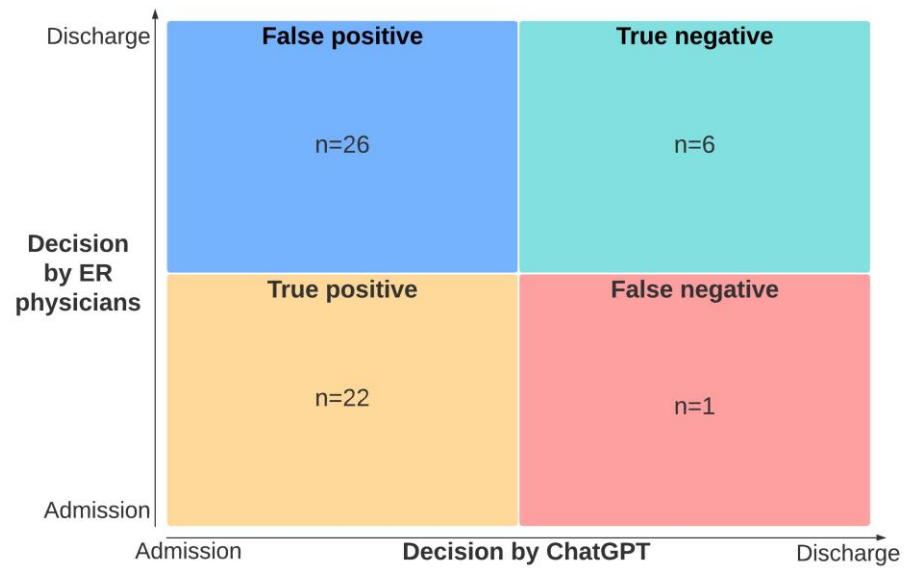

*Figure S1.* Confusion matrix between ER physicians and ChatGPT.

Supplement: s1 [file s1]
